# Supplementary material
Source: publisher figshare collection journal article supplement (https://gsapubs.figshare.com/ndownloader/files/28157181)
Supplement: Supplementary file 1 [file 28157181]

## Sheet: Sheet1
Table S2 LA-ICP-MS zircon U–Pb data for the biotite granites, granite porphyry dykes and MMEs
Spot		U (ppm)	Th (ppm)	Th/U	207Pb/206Pb	1σ	207Pb/235U	1σ	206Pb/238U	1σ	208Pb/232Th	1σ	207Pb/235U (age/Ma)	1σ	206Pb/238U (age/Ma)	1σ
Equigranular biotite granite (ZK3-1-27)
1		2520	229.156	0.0908268	0.0471019	0.00201082	0.098441	0.00400392	0.015022	0.000340955	0.00397513	0.000396739	95.3362	3.70174	96.1	2.2
2		623	541.909	0.869526	0.0445055	0.00411082	0.0897382	0.00783367	0.0152337	0.000477101	0.00440497	0.000314705	87.2595	7.29941	97.5	3
3		6430	349.008	0.054298	0.0463452	0.00175867	0.0924325	0.00345819	0.014467	0.000245142	0.00376928	0.000271577	89.7669	3.21486	92.6	1.6
4		1890	257.001	0.135751	0.0492833	0.00270382	0.103654	0.00621875	0.0152677	0.000653195	0.00454455	0.000407636	100.143	5.72178	97.7	4.1
5		7960	195.645	0.0245651	0.0493968	0.0025089	0.0970389	0.00422342	0.0142513	0.000305357	0.00350686	0.000343856	94.0394	3.90958	91.2	1.9
6		612	144.799	0.236689	0.0443876	0.00311721	0.0894895	0.00587763	0.0146066	0.000416815	0.0038547	0.000355117	87.0277	5.47816	93.5	2.6
7		910	94.9828	0.104414	0.0486811	0.00323809	0.0990578	0.00657413	0.0146752	0.000389185	0.00445461	0.000427563	95.9062	6.07397	93.9	2.5
8		4370	209.04	0.0478379	0.0452894	0.00193948	0.0917152	0.00402746	0.0144499	0.000309973	0.00407059	0.000324022	89.0999	3.74635	92.5	2
9		5740	159.745	0.0278308	0.0507017	0.0020305	0.105113	0.00454235	0.014863	0.000378272	0.00367018	0.000320364	101.485	4.17411	95.1	2.4
10		6430	349.008	0.054298	0.0463452	0.00175867	0.0924325	0.00345819	0.014467	0.000245142	0.00376928	0.000271577	89.7669	3.21486	92.6	1.6
11		497	556.437	1.11892	0.0510431	0.00540434	0.0936588	0.00739332	0.0142907	0.000624722	0.00480929	0.000406386	90.906	6.86444	91.5	4
12		828	180.386	0.217744	0.0515995	0.00535468	0.102553	0.00953516	0.0150363	0.000628116	0.00485399	0.000436237	99.1299	8.78155	96.2	4
13		2130	467.549	0.2194	0.0498617	0.00112542	0.10319	0.0024792	0.0149159	0.000161562	0.00473371	0.000113451	99.7171	2.28288	95.4	1
14		3270	250.006	0.0764434	0.0415484	0.00081097	0.0833224	0.00179304	0.0144952	0.000153579	0.00338759	0.000121564	81.2637	1.6815	92.8	1
15		786	264.51	0.336633	0.0454543	0.0020337	0.0892015	0.00418928	0.0141185	0.000172251	0.00350934	0.000134104	86.7592	3.9058	90.4	1.1
16		797	194.822	0.244392	0.0450843	0.00174128	0.0909774	0.00368188	0.01459	0.000171314	0.00289905	0.000100629	88.4134	3.42729	93.4	1.1
17		2090	197.941	0.0948284	0.0437401	0.00107518	0.0889599	0.00234552	0.014689	0.000173908	0.00317921	0.000114579	86.534	2.18784	94	1.1
18		981	144.487	0.147321	0.0434517	0.00148671	0.085337	0.00297819	0.0142458	0.000173722	0.00357799	0.000136628	83.1503	2.78681	91.2	1.1
19		1200	239.125	0.199219	0.0460014	0.00170964	0.0944134	0.0036025	0.0149553	0.000212741	0.00444591	0.000162402	91.6064	3.34293	95.7	1.4
20		3680	400.475	0.108735	0.0486142	0.00202549	0.0855295	0.00365858	0.0125438	0.000212966	0.00428546	0.000251443	83.3303	3.42263	80.4	1.4
21		6350	158.861	0.0250301	0.0489331	0.00234042	0.0900191	0.00418679	0.013319	0.000267162	0.00538373	0.000546321	87.5211	3.90056	85.3	1.7
22		205	142.404	0.694741	0.0668581	0.00157304	1.08525	0.0268857	0.117181	0.00134392	0.0386375	0.000853113	746.194	13.1015	714	7.8
23		1305	1750	1.33849	0.0646877	0.00105938	0.981204	0.0175963	0.109432	0.000980751	0.0383511	0.00128281	694.222	9.0306	669	5.7
Porphyritic biotite granite (ZK10-1-32)
1		3150	123	0.04	0.0512704	0.00195617	0.105937	0.00432402	0.0147078	0.000285132	0.00429133	0.000351706	102.242	3.97058	94.1	1.8
2		3480	118	0.03	0.0459261	0.00179915	0.0957723	0.00392779	0.0150517	0.000283322	0.00576623	0.000515992	92.8664	3.64018	96.3	1.8
3		4510	159	0.04	0.0495065	0.00208161	0.102464	0.00443614	0.0148687	0.000382466	0.00452368	0.000479145	99.0486	4.08629	95.1	2.4
4		3980	166	0.04	0.0484325	0.00216156	0.0970678	0.0040253	0.0143815	0.000249901	0.00457336	0.000368108	94.0661	3.72613	92	1.6
5		392	138	0.35	0.0471253	0.00527545	0.0898265	0.00958145	0.0145755	0.0005092	0.00385752	0.000338233	87.3418	8.92716	93.3	3.2
6		4240	146	0.03	0.0503449	0.00229616	0.0981957	0.00418728	0.0139943	0.000257624	0.00519208	0.000385483	95.1094	3.87207	89.6	1.6
7		4510	159	0.04	0.0495065	0.00208161	0.102464	0.00443614	0.0148687	0.000382466	0.00452368	0.000479145	99.0486	4.08629	95.1	2.4
8		3790	151	0.04	0.0508498	0.00216145	0.101355	0.0042702	0.0145087	0.000241387	0.00445705	0.000366535	98.0265	3.93743	92.9	1.5
9		1410	128	0.09	0.0471194	0.00289769	0.09837	0.00584411	0.0154185	0.000401113	0.00462815	0.000395034	95.2706	5.40295	98.6	2.5
10		263.259	174.228	0.66	0.0543025	0.00364721	0.10119	0.00585361	0.0140817	0.000257739	0.00455728	0.00016091	97.8744	5.3979	90.1432	1.63914
11		3460	158	0.05	0.0418978	0.00178685	0.0859086	0.00379727	0.0147565	0.000284206	0.00271139	0.000247941	83.6849	3.55111	94.4	1.8
12		2410	279.555	0.12	0.0487759	0.00124226	0.0961343	0.00266488	0.0142344	0.000170126	0.00443326	0.000149478	93.2017	2.46938	91.1	1.1
13		1550	300.172	0.19	0.0514373	0.00199272	0.109553	0.00483018	0.0152994	0.000244735	0.00460086	0.000147463	105.557	4.42082	97.9	1.6
14		4060	91	0.02	0.0444715	0.0020539	0.0899246	0.00434116	0.0145785	0.000293954	0.0052068	0.000443213	87.4331	4.0447	93.3	1.9
15		1640	165.028	0.1	0.0453385	0.00127837	0.0897755	0.00261444	0.0143057	0.000136258	0.00454689	0.000163878	87.2943	2.43669	91.6	0.9
16		2150	207.815	0.1	0.0475685	0.00121812	0.0956357	0.00264921	0.0145194	0.000172869	0.00445031	0.000159607	92.7397	2.45597	92.9	1.1
17		224.047	118.947	0.53	0.0483267	0.00286331	0.0914843	0.00502786	0.0140605	0.000230078	0.00425592	0.000183775	88.8852	4.67769	90.0087	1.46342
18		3670	171.651	0.05	0.045289	0.00109349	0.0907173	0.00236048	0.0144455	0.000158243	0.00487223	0.000188315	88.1714	2.19826	92.5	1
19		2800	232.341	0.08	0.0459918	0.00113417	0.0983924	0.00260476	0.015451	0.000161973	0.00506759	0.000203534	95.2913	2.40878	98.8	1
20		5090	258.169	0.05	0.0469392	0.000858365	0.098233	0.00204545	0.0150766	0.000149032	0.00452111	0.000135101	95.1439	1.89225	96.5	0.9
21		459.33	140.672	0.31	0.0469698	0.0021968	0.0898193	0.00397165	0.014009	0.000203074	0.00437689	0.000160885	87.335	3.70086	89.7	1.3
Granite porphyry dyke (GF-05)
1		4810	450	0.094	0.0482	0.0018	0.0863	0.003	0.0129	0.0002	0.0035	0.0003	84.0242	2.821	82.5	1.5
2		5190	608	0.117	0.053	0.0023	0.094	0.0038	0.0129	0.0003	0.0034	0.0002	91.199	3.53622	82.7	1.6
3		5900	226	0.038	0.0548	0.0021	0.0994	0.0041	0.013	0.0002	0.0088	0.001	96.2479	3.74885	83.3	1.3
4		2720	1800	0.661	0.054	0.0029	0.1001	0.0053	0.0132	0.0003	0.0036	0.0002	96.8678	4.91965	84.8	1.7
5		4410	992	0.225	0.0523	0.0035	0.096	0.0063	0.013	0.0003	0.0035	0.0005	93.0862	5.82948	83.1	1.9
6		6590	226	0.034	0.053	0.0023	0.0999	0.0044	0.0133	0.0003	0.0204	0.0048	96.6717	4.04744	84.9	1.9
7		6900	419	0.061	0.0561	0.0029	0.1103	0.0064	0.0137	0.0003	0.0035	0.0004	106.213	5.81784	87.9	1.8
8		12300	673	0.055	0.0439	0.0017	0.081	0.003	0.0131	0.0002	0.0024	0.0002	79.0471	2.80289	83.8	1.6
9		7750	1370	0.176	0.0466	0.0022	0.0907	0.0041	0.0137	0.0003	0.0046	0.0004	88.1093	3.85117	87.8	1.9
10		1160	927	0.8	0.0583672	0.00212659	0.110943	0.00430555	0.013635	0.000148714	0.00418824	0.000107492	106.828	3.93587	87.3	0.9
11		2570	772	0.3	0.0580259	0.00174251	0.104903	0.00361252	0.0129863	0.000175892	0.00463743	0.000139367	101.292	3.32054	83.2	1.1
12		3490	514	0.1	0.0498505	0.00109622	0.0964757	0.00223705	0.0139652	0.000146563	0.00358114	0.000106664	93.5179	2.07258	89.4	0.9
13		5800	540	0.1	0.0512269	0.00121439	0.097445	0.00272515	0.0136454	0.000147642	0.00262568	0.000155646	94.4151	2.5222	87.4	0.9
14		5110	408	0.1	0.0473632	0.00108657	0.0906251	0.00224111	0.0137726	0.000161072	0.00427424	0.000144224	88.0855	2.08736	88.2	1
15		1380	1000	0.7	0.0592465	0.00321501	0.10885	0.00557107	0.0133888	0.000143174	0.0046957	0.000154268	104.913	5.10197	85.7	0.9
16		375	473	1.3	0.0569611	0.0027531	0.0995772	0.00469798	0.0127732	0.000176683	0.00415296	0.000103139	96.386	4.33875	81.8	1.1
MME (GF-03)
1		246	301	1.22	0.051087	0.00415	0.089486	0.006315	0.013117	0.000249	0.003862	0.000132	87.0241	5.88591	84	1.6
2		221	224	1.01	0.053466	0.005081	0.099524	0.007989	0.013907	0.000312	0.004408	0.000175	96.3372	7.37779	89	2
3		214	229	1.07	0.045892	0.004191	0.083251	0.006185	0.013664	0.000303	0.004179	0.000159	81.1968	5.7973	87.5	1.9
4		303	342	1.13	0.039481	0.003419	0.071623	0.004872	0.013408	0.000255	0.004272	0.000125	70.2389	4.61691	85.9	1.6
5		301	344	1.14	0.043191	0.003787	0.079424	0.006172	0.013481	0.000248	0.004108	0.000131	77.6033	5.80594	86.3	1.6
6		282	326	1.16	0.048608	0.004697	0.087038	0.007574	0.013127	0.000264	0.004225	0.000146	84.7399	7.07495	84.1	1.7
7		328	382	1.17	0.051422	0.003877	0.09204	0.006024	0.013494	0.000277	0.004495	0.000138	89.4023	5.60167	86.4	1.8
8		87.4	55.6	0.64	0.044254	0.006164	0.075033	0.009256	0.013344	0.00041	0.004863	0.000299	73.464	8.74264	85.5	2.6
9		196	206	1.05	0.051957	0.004326	0.09363	0.006988	0.013369	0.000241	0.004077	0.000152	90.8791	6.48829	85.6	1.5
10		217	235	1.08	0.046372	0.005092	0.080681	0.007598	0.013262	0.000317	0.004569	0.000173	78.7851	7.13897	84.9	2
11		205	227	1.11	0.049329	0.00501	0.088248	0.007469	0.013967	0.000323	0.004008	0.000158	85.8702	6.96959	89.4	2.1
12		266	298	1.12	0.05126	0.004026	0.090965	0.006151	0.013226	0.000262	0.003899	0.00013	88.4024	5.72504	84.7	1.7
13		149	144	0.96	0.061029	0.007951	0.106227	0.012297	0.013548	0.000348	0.004269	0.000207	102.509	11.2871	86.7	2.2
14		269	260	0.97	0.053377	0.004589	0.097223	0.007056	0.013534	0.000306	0.004631	0.000153	94.2101	6.52987	86.7	1.9
15		265	296	1.12	0.050208	0.004698	0.089996	0.006994	0.013499	0.000262	0.004491	0.000157	87.4993	6.51533	86.4	1.7
